# Supplementary material for: Use of mobile phones for behavior change communication to improve maternal, newborn and child health: a scoping review
Source: PubMed Central journal article supplement (PMC6925966; doi:10.7189/jogh.09.020425), 2019-12
Supplement: jogh-09-020425-s001.pdf [file jogh-09-020425-s001.pdf]

Appendix S1.

## PubMed Full Search Strategy

(((((("counselling"[All Fields] OR "counseling"[MeSH Terms] OR "counseling"[All Fields]) OR ("behavior"[All Fields] OR "behavior"[MeSH Terms] OR "behavior"[All Fields]) AND ("Change"[Journal] OR "change"[All Fields]))) OR ("nutritional status"[MeSH Terms] OR ("nutritional"[All Fields] AND "status"[All Fields]) OR "nutritional status"[All Fields] OR "nutrition"[All Fields] OR "nutritional sciences"[MeSH Terms] OR ("nutritional"[All Fields] AND "sciences"[All Fields]) OR "nutritional sciences"[All Fields])) OR (("infant"[MeSH Terms] OR "infant"[All Fields]) AND feeding[All Fields])) OR ("breast feeding"[MeSH Terms] OR ("breast"[All Fields] AND "feeding"[All Fields]) OR "breast feeding"[All Fields] OR "breastfeeding"[All Fields])) AND ("cell phones"[MeSH Terms] OR ("cell"[All Fields] AND "phones"[All Fields]) OR "cell phones"[All Fields] OR ("mobile"[All Fields] AND "phone"[All Fields]) OR "mobile phone"[All Fields]) AND English[lang]

**Table S1. Grey Literature Sources: mHealth Online Repositories and Databases**

|                                                       |
|-------------------------------------------------------|
| Center for Health Market Innovations                  |
| <a href="#">GSMA Mobile for Development Resources</a> |
| Health Enabled                                        |
| Johns Hopkins University Global mHealth Initiative    |
| Kiwanji                                               |
| mHealthevidence                                       |
| mHealth Knowledge                                     |
| mHealth Working Group project inventory               |
| NetHope Solutions Center                              |
| USAID mHealth Compendiums                             |
| WHO eHealth database                                  |

**Table S2. Grey Literature Sources: Websites of Organizations or Initiatives**

|                                                 |
|-------------------------------------------------|
| Alive & Thrive                                  |
| Ananya<br>Shaping Demand and Practices          |
| BBC Media Action                                |
| CORE Group<br>CORE Group mHealth Interest Group |
| Dimagi                                          |
| <a href="#">GramVaani</a>                       |
| Grand Challenges                                |
| GSMA mNutrition Initiative                      |
| <a href="#">Health Alliance International</a>   |
| Health Information for All                      |
| Human Network International                     |
| HealthPhone                                     |
| ImTeCHO                                         |
| Institute of Development Studies                |
| <a href="#">Jacaranda Health</a>                |
| <a href="#">John Snow, Inc.</a>                 |
| Medic Mobile                                    |
| Mira Channel                                    |
| Mobenzi Researcher                              |
| Mobile Alliance for Maternal Action             |
| mPowering Frontline Workers                     |
| mSAKHI                                          |
| Nurture Project International                   |
| South Asia Infant Feeding Research Network      |
| Tula Salud                                      |
| <a href="#">World Vision International</a>      |
